# Supplementary material for: LC-MS based quantification of 2′-ribosylated nucleosides Ar(p) and Gr(p) in tRNA
Source: Royal Society of Chemistry journal article supplement (doi:10.1039/c1cc11011j), 2011-01-01
Supplement: c1cc11011j.pdf [file c1cc11011j.pdf]

## LC-MS based quantification of 2'-ribosylated nucleosides Ar(p) and Gr(p) in tRNA

David Pearson<sup>a</sup>, Antje Hienzsch<sup>a</sup>, Mirko Wagner<sup>a</sup>, Daniel Globisch<sup>a</sup>, Veronika Reiter<sup>a</sup>, Dilek Özden<sup>a</sup>, and Thomas Carell<sup>a,\*</sup>

### Supplementary Figure

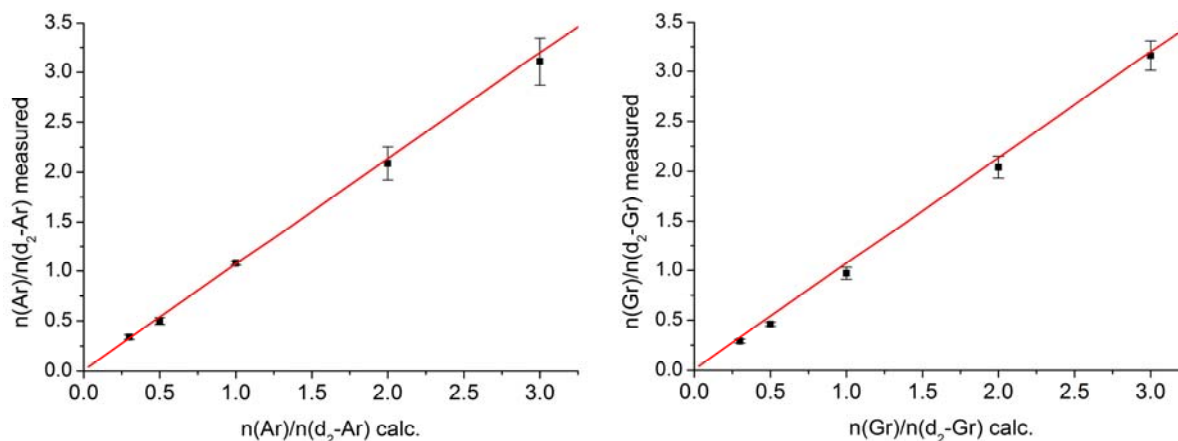

**Fig. S1.** Calibration curves for d<sub>2</sub>-Ar and d<sub>2</sub>-Gr compared to the respective natural nucleosides. Error bars represent +/- 1 s.d. from the mean value.

## Experimental

### Culture methods

*S. scrofa* liver samples and *E. coli* and HeLa cells were grown/obtained and extracted as described previously, and enzymatic digests and all LC-MS experiments were performed as previously reported.<sup>1</sup> 1L-cultures of *S. cerevisiae* (wild type, DMS No: 70449) and *C. albicans* (wild type, DMS No: 1386) were grown in rich medium (YPD, 2% glucose, 2% peptone, and 1% yeast extract) at 30 °C or 37 °C, respectively. Cells were grown to an OD<sub>600</sub> of 0.6 - 0.7 then harvested. Mushroom (*C. nebularis* and *F. fomentarius*) samples (~5 g) were supplied by Prof. Wolfgang Steglich (LMU Munich). tRNA was extracted from yeast samples as described previously for *E. coli*, and from mushroom samples as described for porcine tissue.<sup>1</sup>

### Synthetic methods

**9-[2-O-(5,5-deutero-β-D-ribofuranosyl)-β-D-ribofuranosyl]-adenine 6:** To compound **14** (35 mg, 0.041 mmol) was added a solution of NH<sub>3</sub> (7 N in MeOH, 2 mL) and the resulting solution was stirred for 5 days then concentrated. The residue was suspended in H<sub>2</sub>O (2 mL) and washed with DCM (2 mL × 3) then concentrated. The crude product was purified by reverse-phase HPLC to give 7 mg of **6** as a white solid (43%): mp 120-123 °C, <sup>1</sup>H NMR (400 MHz, D<sub>2</sub>O) δ 8.36 (s, 1H), 8.25 (s, 1H), 6.17 (d, *J* = 6.43 Hz, 1H, NCHCH), 5.09 (s, 1H, OCHO), 4.85-4.81 (m, 1H, NCHCH), 4.61-4.57 (m, 1H, NCHCHCH), 4.33 (d, *J* = 2.50 Hz, 1H, CHCH<sub>2</sub>), 4.17 (d, *J* = 4.55 Hz, 1H,

$CHCHCHCD_2$ ), 4.03 (dd,  $J = 7.27, 4.66$  Hz, 1H,  $CHCHCD_2$ ), 3.96 (d,  $J = 12.88$  Hz, 1H,  $CHH$ ), 3.92-3.82 (m, 2H,  $CHCD_2$ ,  $CHH$ ),  $^{13}C$  NMR (101 MHz,  $D_2O$ )  $\delta$  155.7, 152.6, 148.3, 140.6, 119.0, 105.9, 86.9 (NCHCH), 86.4 ( $CHCH_2$ ), 82.5 ( $CHCD_2$ ), 78.1 (NCHCH), 74.3 ( $CHCHCHCD_2$ ), 70.8 ( $CHCHCD_2$ ), 68.9 (NCHCHCH), 61.4 ( $CH_2$ ),  $m/z$  (ES) 402.1577, calcd for  $C_{15}H_{20}D_2N_5O_8$  ( $MH^+$ ) 402.1594.

**9-[2-*O*-(5,5-deutero- $\beta$ -*D*-ribofuranosyl)- $\beta$ -*D*-ribofuranosyl]guanine 7:** To **18** (76 mg, 0.073 mmol) was added TBAF (0.5 M in THF, 0.35 mL) and the resulting solution was stirred for 15 min then concentrated and co-evaporated twice with DCM. To the residue was added a solution of  $NH_3$  (7N in MeOH, 6.5 mL) and the resulting solution was stirred for 3 days then concentrated. The residue was suspended in  $H_2O$  (2 mL) and washed with DCM (2 mL  $\times$  3) then concentrated. The crude product was purified by reverse-phase HPLC to give 9 mg of **7** as a white solid (30%). mp 120-123 °C,  $^1H$  NMR (600 MHz,  $D_2O$ )  $\delta$  8.00 (s, 1H, NCHN), 5.99 (d,  $J = 6.04$  Hz, 1H, NCHCH), 5.09 (s, 1H, OCHO), 4.55-4.52 (m, 1H,  $CHCHCH_2$ ), 4.24 (s, 1H,  $CHCH_2$ ), 4.14 (d,  $J = 4.11$  Hz, 1H,  $CHCHCHCD_2$ ), 4.05 (dd,  $J = 6.91, 4.18$  Hz, 1H,  $CHCHCD_2$ ), 3.91-3.81 (m, 3H,  $CH_2 + CHCD_2$ ),  $^{13}C$  NMR (151 MHz,  $D_2O$ )  $\delta$  158.9, 153.8, 151.1, 138.1 (NCHN), 116.6, 106.1 (OCHO), 86.4 (NCHCH), 86.0 ( $CHCH_2$ ), 82.6 ( $CHCD_2$ ), 77.8 (NCHCH), 74.3 ( $CHCHCHCD_2$ ), 71.0 ( $CHCHCD_2$ ), 68.8 ( $CHCHCH_2$ ), 61.3 ( $CH_2$ ),  $m/z$  (ES) 418.1536, calcd for  $C_{15}H_{20}D_2N_5O_9$  ( $MH^+$ ) 418.1543.

**1,2,3-*O*-benzoyl-5,5-deutero-5-*O*-(4-methoxyphenyldiphenylmethyl)-*D*-ribofuranose**

**9:** A solution of 5,5'- $d_2$ -ribose **8** (1g, 6.6 mmol) and monomethoxytrityl chloride (2.4g, 7.8 mmol) in pyridine (13 mL) was stirred at r.t for 24 h, then cooled to 0°C and a solution of benzyl chloride (3.5 mL, 4.2 g, 30 mmol) in 1,2-dichloroethane (10 mL) was added. The resulting solution was stirred for at r.t for 16 h, then cooled to 0°C and EtOH (3.5 mL) was added. The solution was stirred at r.t for 20 min, then concentrated. The residue was redissolved in chloroform, washed with  $H_2O$ , dried over  $NaSO_4$ , concentrated, then coevaporated twice with toluene. The crude material was partially purified by flash chromatography, eluting with 1:4 EtOAc/isohehexane to give **9** (4.8g) as a mixture of the  $\alpha$  and  $\beta$  anomers that was used in the subsequent step without further purification.

**1,2,3-*O*-benzoyl-5,5-deutero-*D*-ribofuranose 10:** A mixture of **9** (3.7g, 5.0 mmol) and 80% AcOH in  $H_2O$  (100 mL) was stirred for 16 h, then concentrated and coevaporated twice with toluene. The crude material was purified twice by silica column chromatography, eluting with 1:39 EtOAc/DCM to give **10 $\beta$**  (480 mg, 20% over two steps) as a white foam:  $^1H$  NMR (300 MHz,  $CDCl_3$ )  $\delta$  8.09 (dd,  $J = 8.4, 1.4$  Hz, 2H), 8.04 (dd,  $J = 8.4, 1.3$  Hz, 2H), 7.91 (dd,  $J = 8.4, 1.3$  Hz, 2H), 7.65-7.40 (m, 7H), 7.34 (t,  $J = 7.7$  Hz, 2H), 6.67 (s, 1H, OCHO), 5.95-5.90 (m, 2H), 4.62-4.57 (m, 1H,  $CHCD_2$ ), 2.18 (s, 1H, OH).  $^{13}C$  NMR (75 MHz,  $CDCl_3$ )  $\delta$  165.7, 165.0, 164.7, 133.8, 133.6, 133.5, 130.0, 129.9, 129.7, 128.9, 128.9, 128.8, 128.6, 128.5, 128.4, 98.9 (OCHO), 83.1 ( $CHCD_2$ ), 75.5, 70.9,  $m/z$  (ES) 499.1125, calcd for  $C_{26}H_{20}D_2O_8$  (MCl) 499.1129, then eluting with 1:9 EtOAc/DCM to give **10 $\alpha$**  (660 mg, 28% over two steps) as a white foam:  $^1H$  NMR (300 MHz,  $CDCl_3$ )  $\delta$  8.07 (d,  $J = 8.41$  Hz, 4H), 7.86 (dd,  $J = 8.33, 1.24$  Hz, 2H), 7.57 (dd,  $J = 16.99, 7.59$  Hz, 2H), 7.48 (t,  $J = 7.46$  Hz, 1H), 7.34-7.15 (m, 6H), 6.95 (d,  $J = 4.38$  Hz, 1H, OCHO), 5.84 (dd,  $J = 6.61, 2.28$  Hz, 1H, ( $CHCHCD_2$ )), 5.65 (dd,  $J = 6.61, 4.40$  Hz, 1H,  $CHCHCHCD_2$ ), 4.65 (d,  $J = 2.28$  Hz, 1H,  $CHCD_2$ ), 2.53 (s, 1H, OH),  $^{13}C$  NMR (75 MHz,  $CDCl_3$ )  $\delta$  165.9, 165.3, 165.0, 133.5, 133.4, 133.4, 129.9, 129.

8, 129.7, 129.6, 129.4, 128.7, 128.4, 128.3, 95.0 (OCHO), 85.5 (CHCD<sub>2</sub>), 71.8 (CHCHCHCD<sub>2</sub>), 71.0 (CHCHCD<sub>2</sub>), *m/z* (ES) 482.1787, calcd for C<sub>26</sub>H<sub>24</sub>D<sub>2</sub>NO<sub>8</sub> (M.NH<sub>4</sub><sup>+</sup>) 482.1778.

**1,2,3-*O*-benzoyl-5,5-deutero-5-*O*-phenoxyacetyl- $\beta$ -*D*-ribofuranose 11**: To a solution of **10 $\beta$**  (450 mg, 0.97 mmol) in pyridine (1 mL) and 1,2-dichloroethane (4 mL) was added phenoxyacetic anhydride (360 mg, 1.3 mmol) and the resulting solution was stirred at r.t for 1 h, then MeOH (0.2 mL) was added. The solution was stirred for 30 min, then diluted with DCM, washed with brine, dried over NaSO<sub>4</sub> and concentrated. The crude material was purified by silica column chromatography, eluting with DCM to obtain **11** (350 mg, 60%) as a white foam: <sup>1</sup>H NMR (400 MHz, CDCl<sub>3</sub>)  $\delta$  8.09 (d, *J* = 7.23 Hz, 2H), 8.03 (d, *J* = 7.24 Hz, 2H), 7.90 (d, *J* = 7.26 Hz, 2H), 7.59 (t, *J* = 7.46 Hz, 2H), 7.52 (t, *J* = 7.47 Hz, 1H), 7.47-7.41 (m, 4H), 7.33 (t, *J* = 7.88 Hz, 2H), 7.25-7.20 (m, 2H), 6.95 (t, *J* = 7.38 Hz, 1H), 6.77 (d, *J* = 7.80 Hz, 2H), 6.64 (s, 1H, OCHO), 5.94-5.92 (m, 1H, CHCHCHCD<sub>2</sub>), 5.89 (dd, *J* = 6.89, 4.88 Hz, 1H, CHCHCD<sub>2</sub>), 4.74 (d, *J* = 6.89 Hz, 1H, CHCD<sub>2</sub>), 4.51 (d, *J* = 16.04 Hz, 1H, CHH), 4.40 (d, *J* = 16.07 Hz, 1H, CHH), <sup>13</sup>C NMR (101 MHz, CDCl<sub>3</sub>)  $\delta$  168.4, 165.4, 165.0, 164.5, 157.5, 133.8, 133.7, 133.7, 129.9, 129.9, 129.8, 129.5, 129.0, 128.8, 128.7, 128.6, 128.5, 121.7, 114.6, 99.0 (OCHO), 79.6 (CHCD<sub>2</sub>), 75.0 (CHCHCHCD<sub>2</sub>), 71.3 (CHCHCD<sub>2</sub>), 64.9 (CH<sub>2</sub>), *m/z* (ES) 616.2155, calcd for C<sub>34</sub>H<sub>30</sub>D<sub>2</sub>NO<sub>10</sub> (M.NH<sub>4</sub><sup>+</sup>) 616.2152.

***N*<sup>6</sup>-benzoyl-9-[2-*O*-[2,3-*O*-benzoyl-5,5-deutero-5-*O*-phenoxyacetyl- $\beta$ -*D*-ribofuranosyl]-3,5-*O*-(1,1,3,3-tetraisopropylidisiloxane-1,3-diyl)- $\beta$ -*D*-ribofuranosyl]-adenine 13**: A solution of **11** (100 mg, 0.17 mmol) [note: reactants **11** and **12** were each dried under vacuum (<0.5 mmHg) at 45°C for 4 h prior to reaction] in 1,2-dichloroethane (2 mL) was cooled to 0°C and SnCl<sub>4</sub> (30  $\mu$ L, 66 mg, 0.26 mmol) was added. The resultant solution was stirred at 0°C for 10 min, then **12** (120 mg, 0.20 mmol) was added. The solution was stirred at 0°C for 16 h, then DCM (2 mL) and sat. NaHCO<sub>3</sub> (2 mL) were added. The mixture was stirred for 20 min, then filtered through celite, washed with H<sub>2</sub>O, dried over NaSO<sub>4</sub> and concentrated. The crude material was purified by silica column chromatography, eluting with 1:99 MeOH/DCM to give **13** (160 mg, 86%) as a white foam: <sup>1</sup>H NMR (600 MHz, CDCl<sub>3</sub>)  $\delta$  9.04 (s, 1H, NH), 8.75 (s, 1H), 8.29 (s, 1H), 8.02 (dd, *J* = 8.35, 1.22 Hz, 2H), 7.98 (dd, *J* = 8.43, 1.30 Hz, 2H), 7.87 (dd, *J* = 8.41, 1.27 Hz, 2H), 7.62-7.57 (m, 2H), 7.54-7.50 (m, 3H), 7.43 (dd, *J* = 8.20, 7.52 Hz, 2H), 7.32 (dd, *J* = 8.25, 7.53 Hz, 2H), 7.21 (dd, *J* = 8.75, 7.37 Hz, 2H), 6.92 (t, *J* = 7.36 Hz, 1H), 6.85 (dd, *J* = 8.76, 0.99 Hz, 2H), 6.19 (s, 1H), 5.81 (dd, *J* = 4.98, 0.82 Hz, 1H), 5.80-5.77 (m, 2H), 4.97 (dd, *J* = 9.27, 4.64 Hz, 1H), 4.77 (d, *J* = 4.61 Hz, 1H), 4.66 (d, *J* = 16.16 Hz, 1H, OCHHCOO), 4.61 (d, *J* = 16.17 Hz, 1H, OCHHCOO), 4.61 (d, *J* = 6.31 Hz, 1H), 4.21 (dd, *J* = 13.35, 1.43 Hz, 1H, CHCHH), 4.16 (td, *J* = 9.22, 2.18 Hz, 1H), 4.02 (dd, *J* = 13.30, 2.62 Hz, 1H, CHCHH), 1.11-0.94 (m, 28H, 4 $\times$ CH(CH<sub>3</sub>)<sub>2</sub>), <sup>13</sup>C NMR (151 MHz, CDCl<sub>3</sub>)  $\delta$  168.7, 165.3, 164.9, 164.5, 157.6, 152.7, 150.8, 149.4, 141.9, 133.8, 133.49, 133.48, 132.7, 129.7, 129.5, 129.0, 128.83, 128.78, 128.5, 128.4, 127.8, 123.5, 121.7, 114.6, 105.8, 88.8, 81.4, 79.6, 78.9, 75.5, 72.3, 69.8, 65.2 (OCH<sub>2</sub>COO), 59.8 (CHCH<sub>2</sub>), 17.4, 17.33, 17.28, 17.26, 17.2, 17.1, 16.9, 16.8, 13.3, 12.9, 12.8, 12.6, *m/z* (ES) 1090.4301, calcd for C<sub>56</sub>H<sub>64</sub>D<sub>2</sub>N<sub>5</sub>O<sub>14</sub>Si<sub>2</sub> (MH<sup>+</sup>) 1090.4270.

***N*<sup>6</sup>-benzoyl-9-[2-*O*-[2,3-*O*-benzoyl-5,5-deutero-5-*O*-phenoxyacetyl- $\beta$ -*D*-ribofuranosyl]- $\beta$ -*D*-ribofuranosyl]-adenine 14**: To **13** (130 mg, 0.12 mmol) was added TBAF (0.5 M in THF, 1 mL) and the resulting solution was stirred for 15 min then

concentrated. The crude material was purified twice by silica column chromatography, eluting with 1:24 MeOH/DCM to give **14** (65 mg, 64%) as a white foam:  $^1\text{H}$  NMR (600 MHz,  $\text{CDCl}_3$ )  $\delta$  9.27 (s, 1H), 8.80 (s, 1H), 8.21 (s, 1H), 8.01 (d,  $J = 7.17$  Hz, 2H), 7.89-7.84 (m, 4H), 7.58 (t,  $J = 7.44$  Hz, 1H), 7.54-7.50 (m, 2H), 7.49 (t,  $J = 7.78$  Hz, 2H), 7.34 (dt,  $J = 8.27, 1.88$  Hz, 4H), 7.26 (t,  $J = 8.05$  Hz, 2H), 6.96 (t,  $J = 7.38$  Hz, 1H), 6.92 (dd,  $J = 8.75, 0.93$  Hz, 2H), 6.08 (d,  $J = 7.42$  Hz, 1H, NCHCH), 6.02 (d,  $J = 11.06$  Hz, 1H,  $\text{CH}_2\text{OH}$ ), 5.58 (dd,  $J = 5.37, 2.13$  Hz, 1H, CHCHCH $\text{CD}_2$ ), 5.55 (t,  $J = 5.28$  Hz, 1H, CHCH $\text{CD}_2$ ), 5.19 (dd,  $J = 7.39, 4.70$  Hz, 1H, NCHCH), 5.15 (d,  $J = 2.11$  Hz, 1H, OCHO), 4.74 (d,  $J = 0.85$  Hz, 2H,  $\text{OCH}_2\text{COO}$ ), 4.63 (d,  $J = 4.70$  Hz, 1H, CHCH $\text{CH}_2$ ), 4.34 (d,  $J = 5.23$  Hz, 1H, CH $\text{CD}_2$ ), 4.30 (s, 1H, CH $\text{CH}_2$ ), 3.95 (d,  $J = 12.97$  Hz, 1H, CHCHH), 3.73 (t,  $J = 11.85$  Hz, 1H, CHCHH), 3.39 (s, 1H, CHOH),  $^{13}\text{C}$  NMR (151 MHz,  $\text{CDCl}_3$ )  $\delta$  168.8, 165.4, 165.3, 164.53, 157.53, 152.2, 150.5, 150.3, 144.2, 133.8, 133.7, 133.5, 132.8, 129.8, 129.7, 129.6, 128.8, 128.5, 128.5, 128.5, 128.4, 127.9, 124.3, 121.9, 114.6, 106.7 (OCHO), 89.2 (NCHCH), 87.2 (CH $\text{CH}_2$ ), 81.1 (NCHCH), 79.9 (CH $\text{CD}_2$ ), 75.7 (CHCHCH $\text{CD}_2$ ), 71.7 (CHCH $\text{CH}_2$ ), 71.6 (CHCH $\text{CD}_2$ ), 65.3 ( $\text{OCH}_2\text{COO}$ ), 63.2 (CH $\text{CH}_2$ ),  $m/z$  (ES) 848.2763, calcd for  $\text{C}_{44}\text{H}_{38}\text{D}_2\text{N}_5\text{O}_{13}$  ( $\text{MH}^+$ ) 848.2748.

**1-O-methyl-2,3,5-O-benzoyl-5,5-deutero- $\beta$ -D-ribofuranose 15:** A solution of 5,5'-d<sub>2</sub>-ribose **8** (200 mg, 1.3 mmol) in MeOH (4 mL) was cooled to 0°C and Dowex 50 W-8 100 cation exchange resin (300 mg, vacuum dried) was added. The resulting mixture was kept at 4°C for 24 h then filtered through celite and concentrated. The residue was dried by evaporation of pyridine (3  $\times$  5 mL), then redissolved in DCM (1.1 mL) and pyridine (2.4 mL), cooled to 0°C and BzCl (1 g, 7.1 mmol) was added. The resulting mixture was kept at 4°C for 24 h, then H<sub>2</sub>O (0°C, 5 mL) was added and the organic layer was separated. The aqueous layer was washed with DCM (3  $\times$  10 mL) then the organic layers were combined then co-evaporated with toluene (3  $\times$  10 mL). The crude material was purified by column chromatography, eluting with 1:9 to 1:14 EtOAc/isohexane to give **15** (513 mg, 82%) as a colourless oil.  $^1\text{H}$  NMR (600 MHz,  $\text{CDCl}_3$ )  $\delta$  8.08 (dd,  $J = 8.41, 1.30$  Hz, 2H), 8.02 (dd,  $J = 8.40, 1.30$  Hz, 2H), 7.89 (dd,  $J = 8.42, 1.29$  Hz, 2H), 7.59-7.49 (m, 3H), 7.44-7.38 (m, 4H), 7.32 (dd,  $J = 8.32, 7.51$  Hz, 2H), 5.87 (ddd,  $J = 7.04, 4.86, 0.35$  Hz, 1H), 5.68 (d,  $J = 4.87$  Hz, 1H), 5.16 (s, 1H), 4.72 (d,  $J = 7.10$  Hz, 1H), 3.42 (s, 3H,  $\text{CH}_3$ ),  $^{13}\text{C}$  NMR (151 MHz,  $\text{CDCl}_3$ )  $\delta$  166.2, 165.4, 165.2, 133.4, 133.3, 133.1, 129.8, 129.7, 129.7, 129.2, 128.9, 128.5, 128.3, 128.3, 106.4, 78.9, 75.4, 72.4, 55.4 ( $\text{CH}_3$ ),  $m/z$  (ES) 496.1933, calcd for  $\text{C}_{27}\text{H}_{26}\text{D}_2\text{NO}_8$  ( $\text{M.NH}_4^+$ ) 496.1940.

**1-O-acetyl-2,3,5-O-benzoyl-5,5-deutero- $\beta$ -D-ribofuranose 16:** A solution of **15** (350 mg, 0.73 mmol) in AcOH (1.6 mL) and Ac<sub>2</sub>O (3.9 mL) was cooled to 0°C and H<sub>2</sub>SO<sub>4</sub> (98%, 0.55 mL) was added. The resulting solution was kept at 4°C for 26 h, then H<sub>2</sub>O (4°C, 10 mL) was added and the organic layer was separated. The aqueous layer was washed with DCM (3  $\times$  20 mL) then the organic layers were combined and concentrated. The crude material was purified by column chromatography, eluting with 1:4 EtOAc/isohexane, then further purified by recrystallisation from isopropanol to give **16** (180 mg, 49%) as a white solid. m.p. 113-116°C,  $^1\text{H}$  NMR (600 MHz,  $\text{CDCl}_3$ )  $\delta$  8.08 (dd,  $J = 8.40, 1.28$  Hz, 2H), 8.00 (dd,  $J = 8.41, 1.28$  Hz, 2H), 7.89 (dd,  $J = 8.42, 1.27$  Hz, 2H), 7.60-7.51 (m, 3H), 7.45-7.39 (m, 4H), 7.33 (dd,  $J = 8.32, 7.51$  Hz, 2H), 6.43 (s, 1H), 5.91 (dd,  $J = 7.12, 4.89$  Hz, 1H), 5.79 (d,  $J = 4.89$  Hz, 1H), 4.78 (d,  $J = 7.16$  Hz, 1H), 2.00 (s, 3H,  $\text{CH}_3$ ),  $^{13}\text{C}$  NMR (151 MHz,  $\text{CDCl}_3$ )  $\delta$  169.0, 166.0, 165.3, 165.0, 133.6, 133.5, 133.2, 129.8, 129.7, 129.6, 128.8, 128.6, 128.5, 128.4, 128.4, 98.4, 79.8, 75.0, 71.3, 20.9,  $m/z$  (ES) 529.1436, calcd for  $\text{C}_{28}\text{H}_{22}\text{D}_2\text{NaO}_9$  ( $\text{M.Na}^+$ ) 519.1444.

***N*<sup>2</sup>-isobutyryl-9-[2-*O*-[2,3,5-*O*-benzoyl-5,5-deutero- $\beta$ -*D*-ribofuranosyl]-3,5-*O*-(1,1,3,3-tetraisopropylidisiloxane-1,3-diyl)- $\beta$ -*D*-ribofuranosyl]guanine **18****: A solution of **16** (100 mg, 0.17 mmol) [note: reactants were dried under vacuum (<0.5 mmHg) at 45°C for 4 h prior to reaction] in 1,2-dichloroethane (2 mL) was cooled to 0°C and SnCl<sub>4</sub> (30  $\mu$ L, 66 mg, 0.26 mmol) was added. The resultant solution was stirred at 0°C for 10 min, then **17** (120 mg, 0.20 mmol) was added. The solution was stirred at 0°C for 16 h, then sat. NaHCO<sub>3</sub> (1 mL) was added. The mixture was stirred for 10 min, then filtered through celite, washed with H<sub>2</sub>O, dried over NaSO<sub>4</sub> and concentrated. The crude material was purified by silica column chromatography, eluting with 2:98 MeOH/DCM to give **18** (93 mg, 52%) as a white foam:

<sup>1</sup>H NMR (600 MHz, CDCl<sub>3</sub>)  $\delta$  8.16 (s, 1H, NCHN), 8.00-7.96 (m, 4H), 7.91 (dd, *J* = 8.31, 1.20 Hz, 2H), 7.59 (t, *J* = 7.45 Hz, 1H), 7.55 (t, *J* = 7.46 Hz, 2H), 7.43 (t, *J* = 7.88 Hz, 2H), 7.37-7.32 (m, 4H), 6.13 (t, *J* = 5.47 Hz, 1H), 5.89 (d, *J* = 5.52 Hz, 1H), 5.86 (s, 1H), 5.75 (s, 1H), 4.77 (d, *J* = 5.83 Hz, 1H), 4.57 (dd, *J* = 9.40, 3.81 Hz, 1H), 4.29 (d, *J* = 3.79 Hz, 1H), 4.27 (d, *J* = 13.59 Hz, 1H, CHCHH), 4.18 (dd, *J* = 9.42, 2.05 Hz, 1H), 4.01 (dd, *J* = 13.56, 2.60 Hz, 1H, CHCHH), 2.89 (sept., *J* = 6.88 Hz, 1H, COCHCH<sub>3</sub>CH<sub>3</sub>), 1.35 (d, *J* = 6.86 Hz, 3H, COCHCH<sub>3</sub>CH<sub>3</sub>), 1.25 (d, *J* = 6.83 Hz, 3H, COCHCH<sub>3</sub>CH<sub>3</sub>), 1.14-0.90 (m, 28H, 4 $\times$ CH(CH<sub>3</sub>)<sub>2</sub>), <sup>13</sup>C NMR (151 MHz, CDCl<sub>3</sub>)  $\delta$  179.4, 167.9, 165.3, 165.0, 154.8, 148.6, 146.9, 135.7, 134.0, 133.6, 129.71, 129.68, 129.0, 128.9, 128.8, 128.7, 128.5, 128.4, 120.5, 105.5, 87.5, 81.3, 79.3, 78.7, 75.8, 73.2, 69.3, 59.4 (CH<sub>2</sub>), 36.1, 19.2 (COCHCH<sub>3</sub>CH<sub>3</sub>), 18.9 (COCHCH<sub>3</sub>CH<sub>3</sub>), 17.5, 17.4, 17.29, 17.27, 17.1, 17.0, 16.8, 16.7, 13.3, 13.0, 12.8, 12.6, *m/z* (ES) 1042.4273, calcd for C<sub>52</sub>H<sub>64</sub>D<sub>2</sub>N<sub>5</sub>O<sub>14</sub>Si<sub>2</sub> (MH<sup>+</sup>) 1042.4270.

## NMR Spectra

6

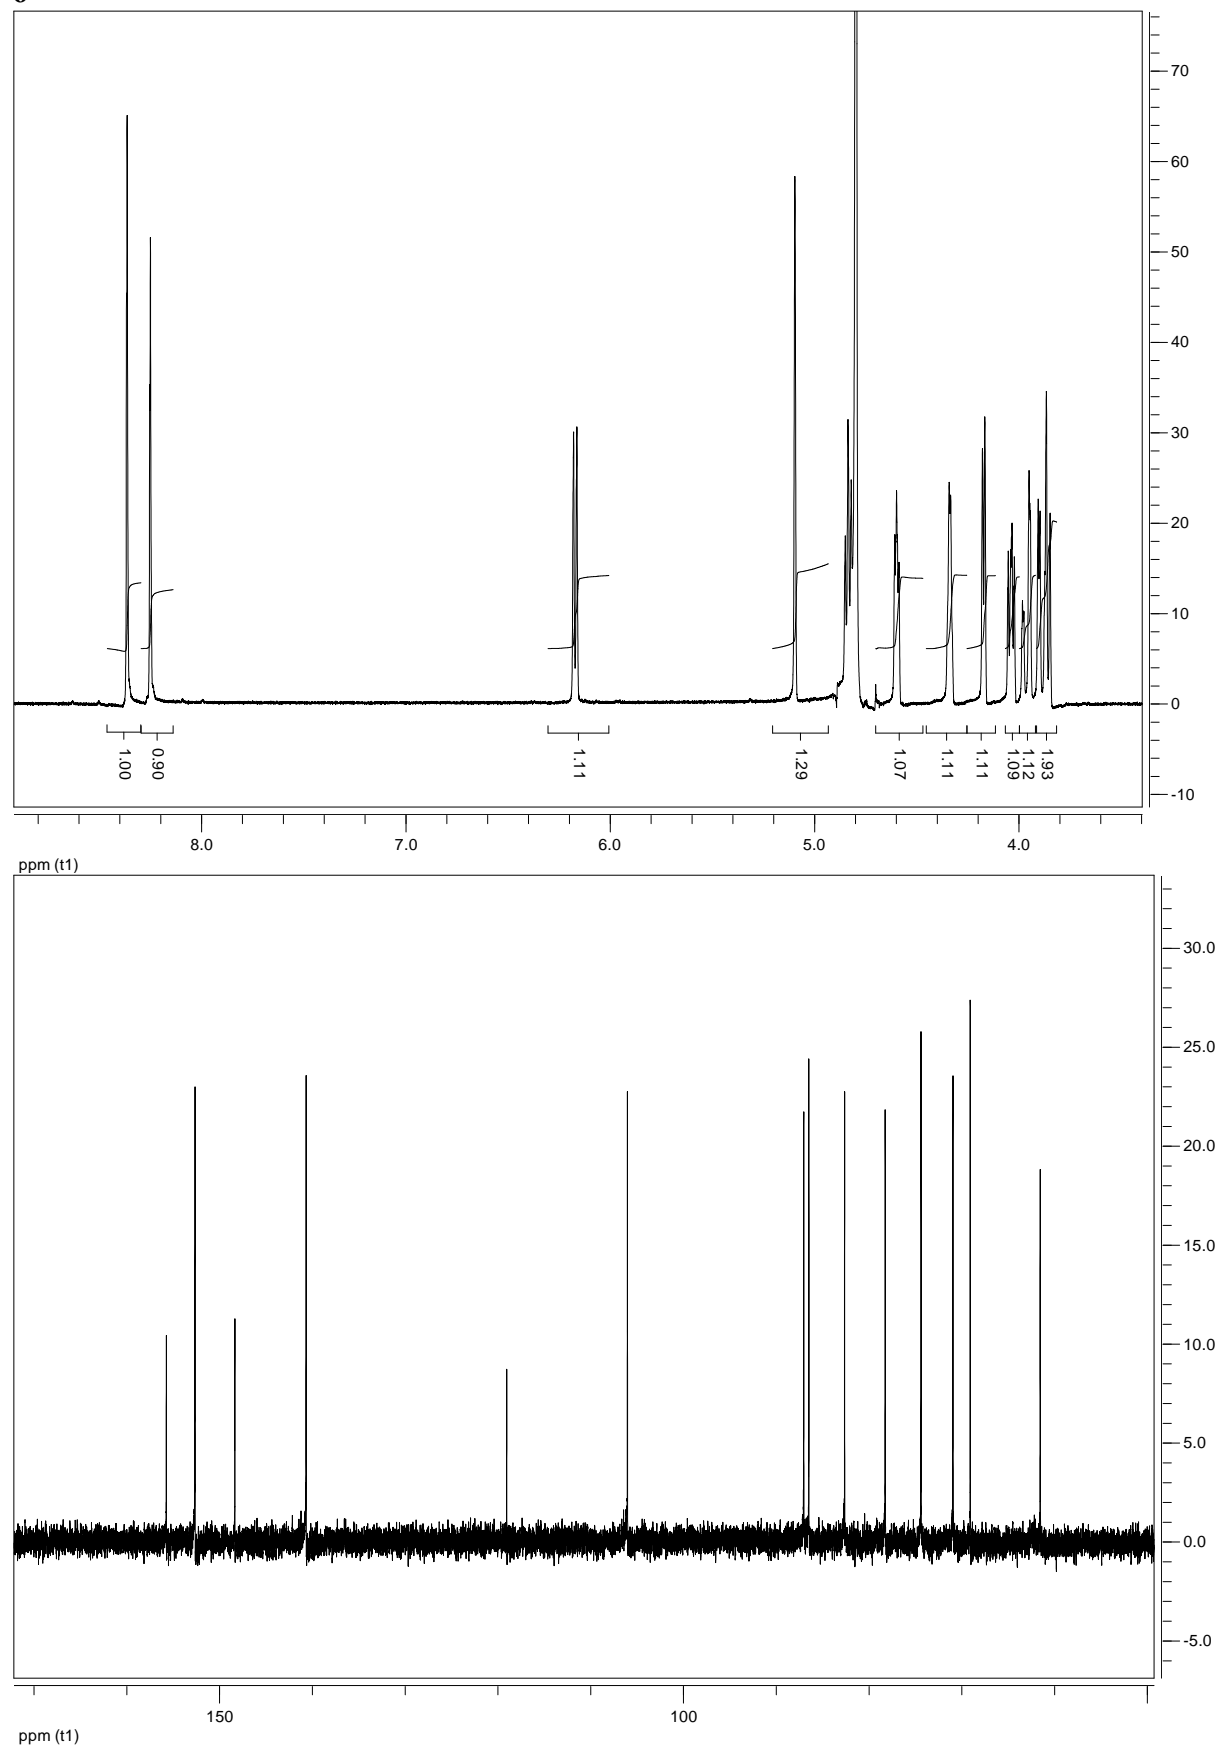

7

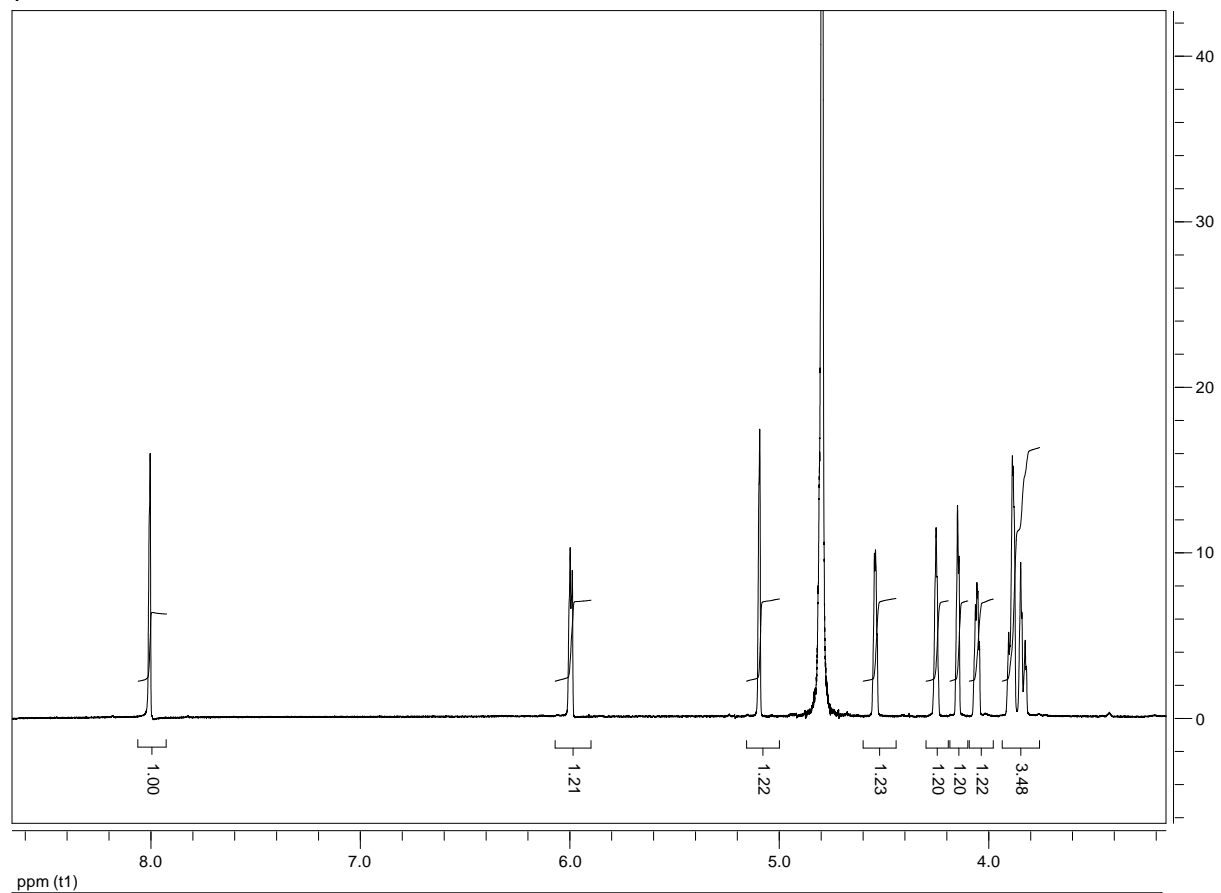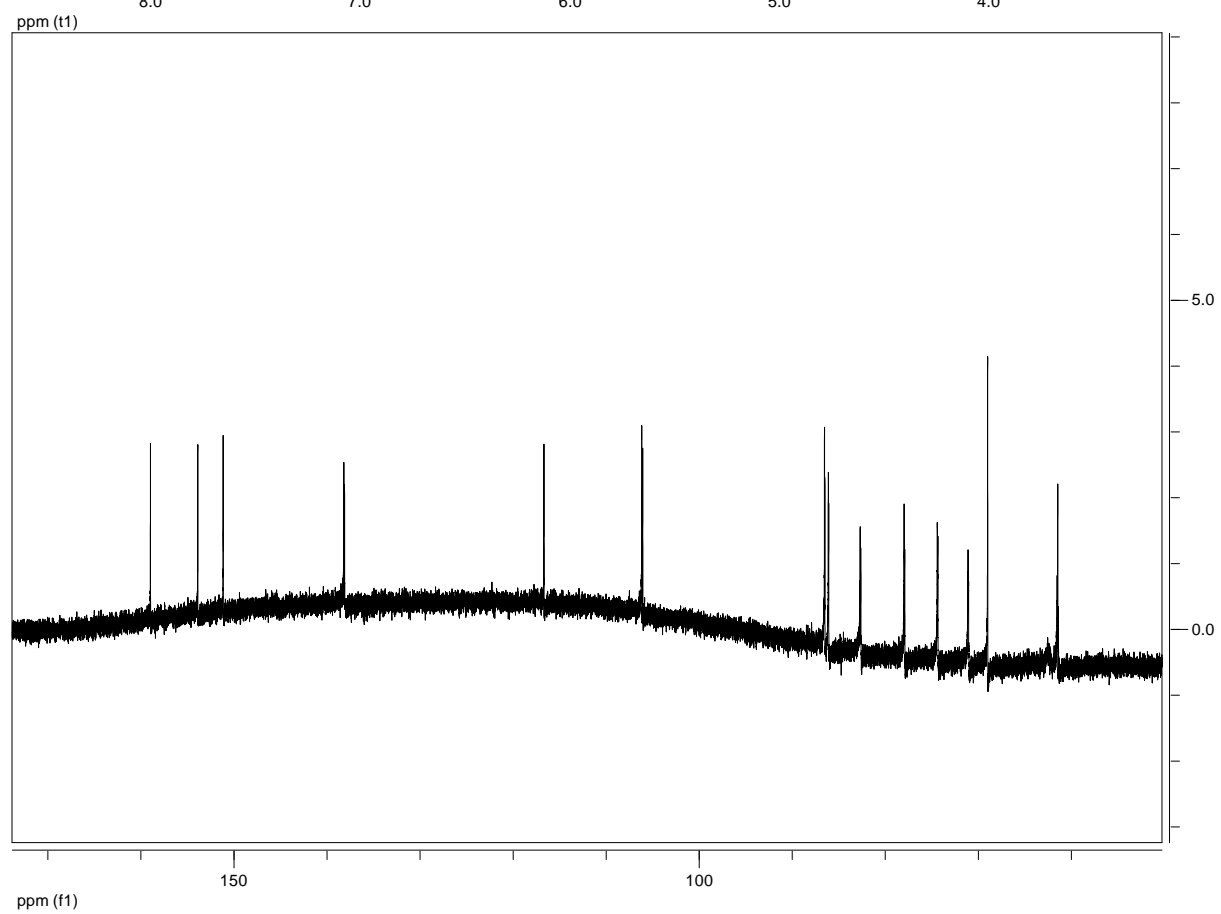

10α

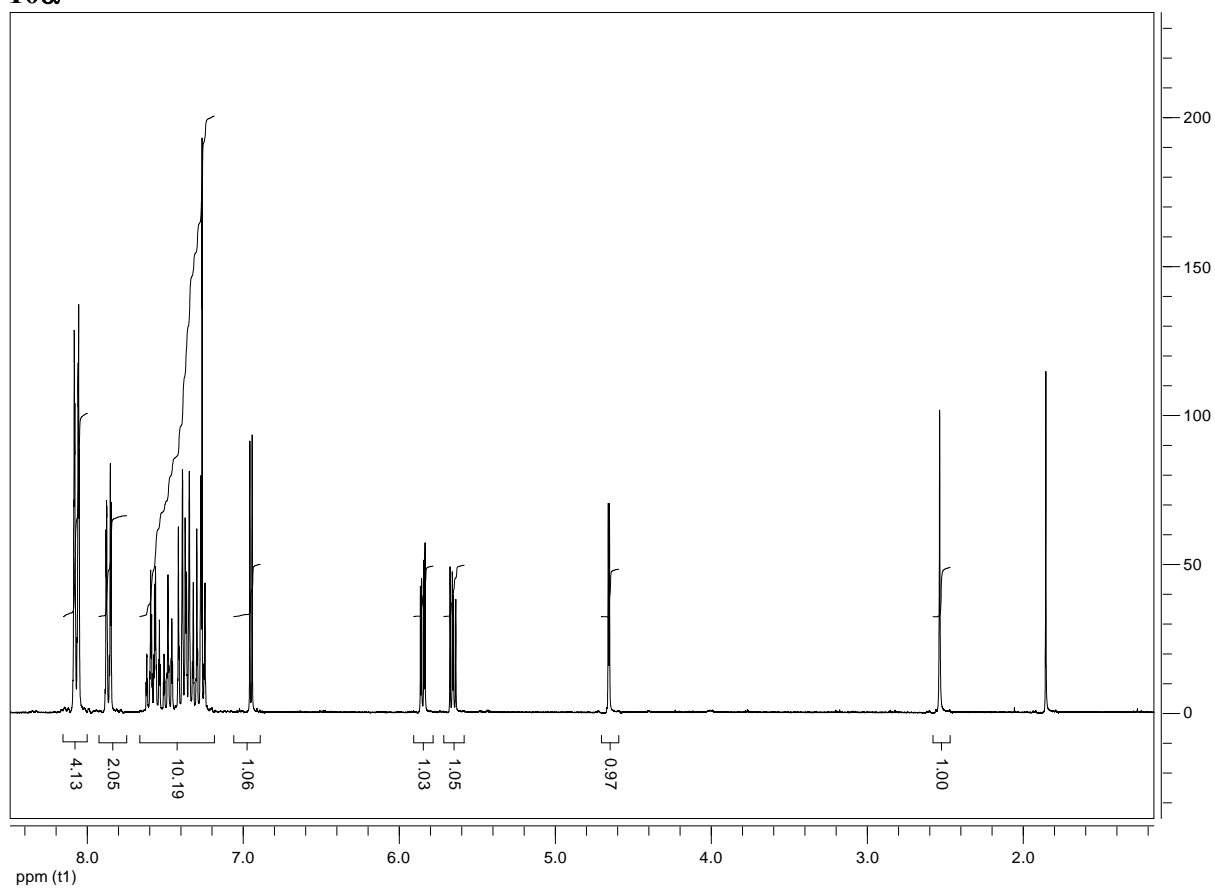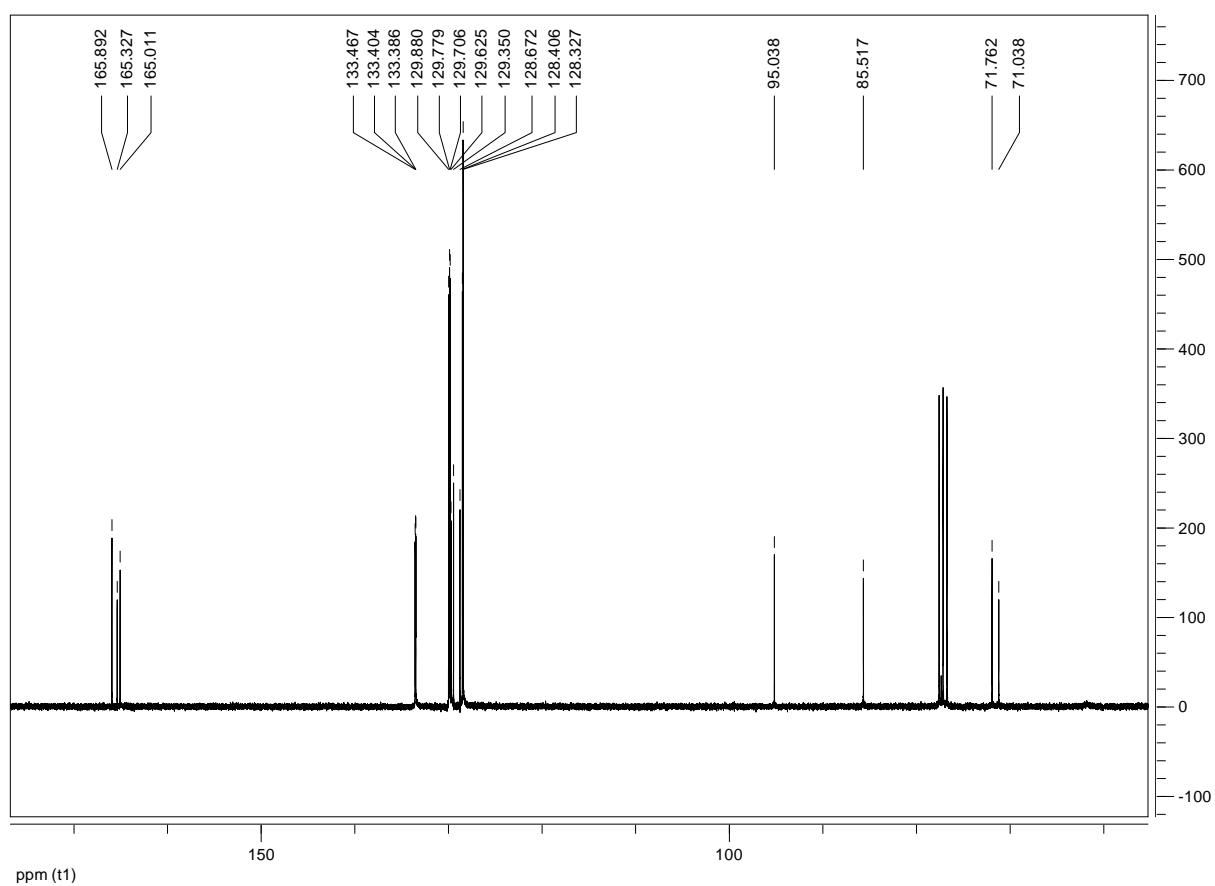



10 $\beta$

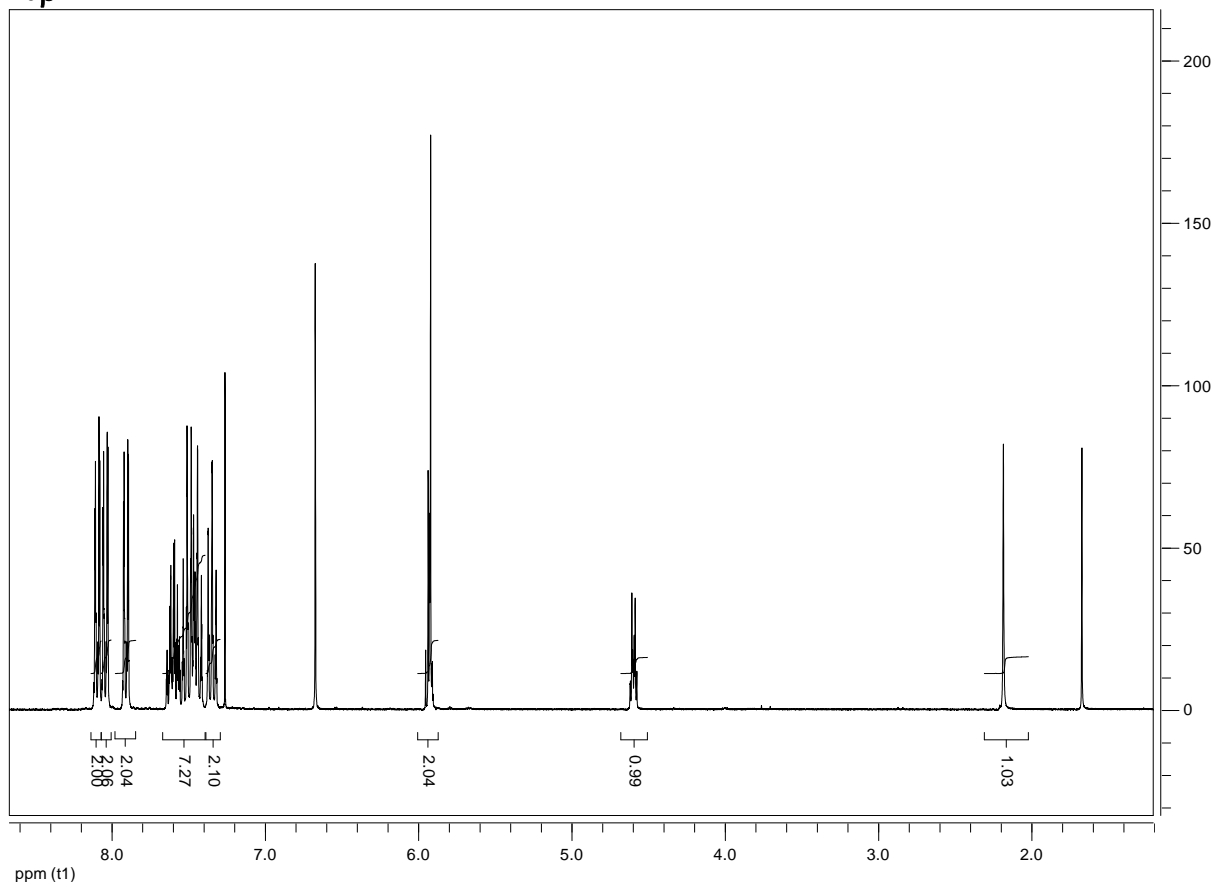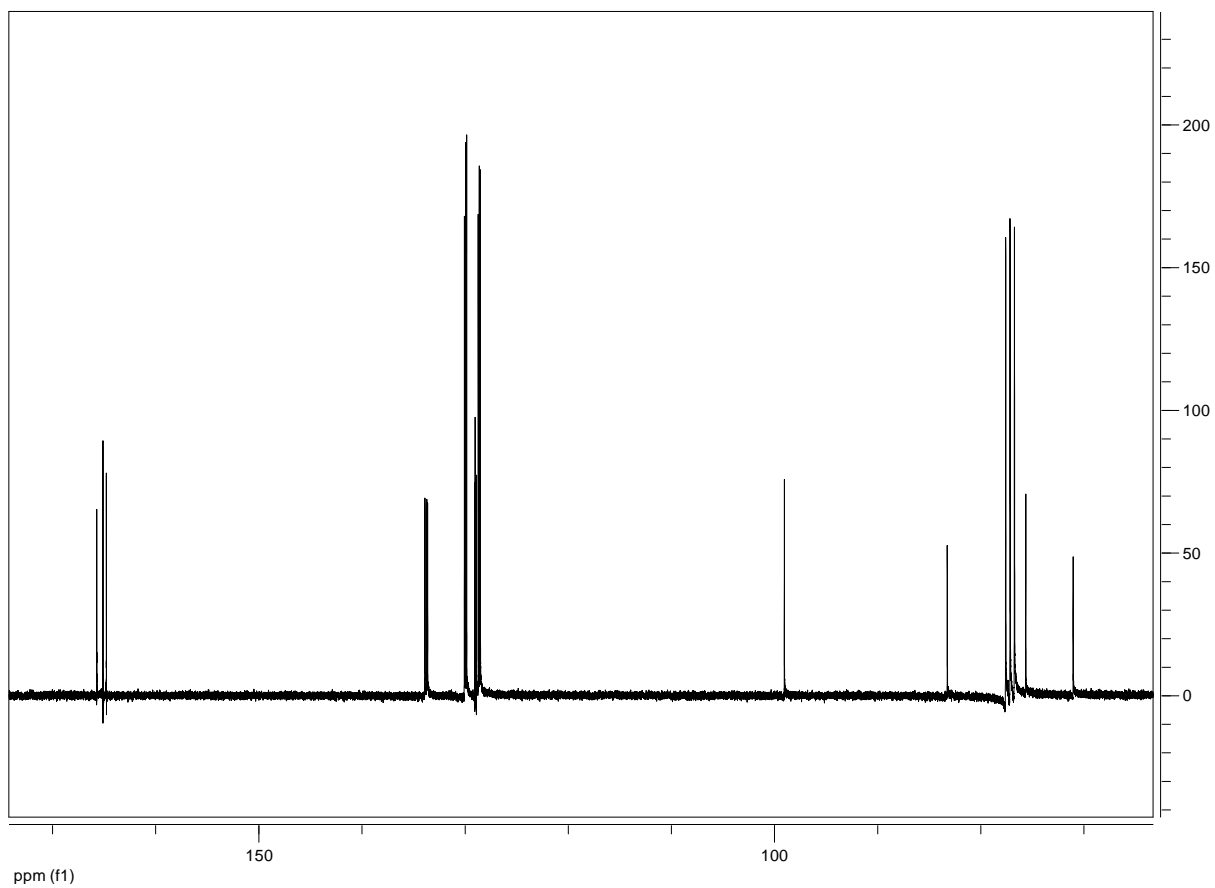

11

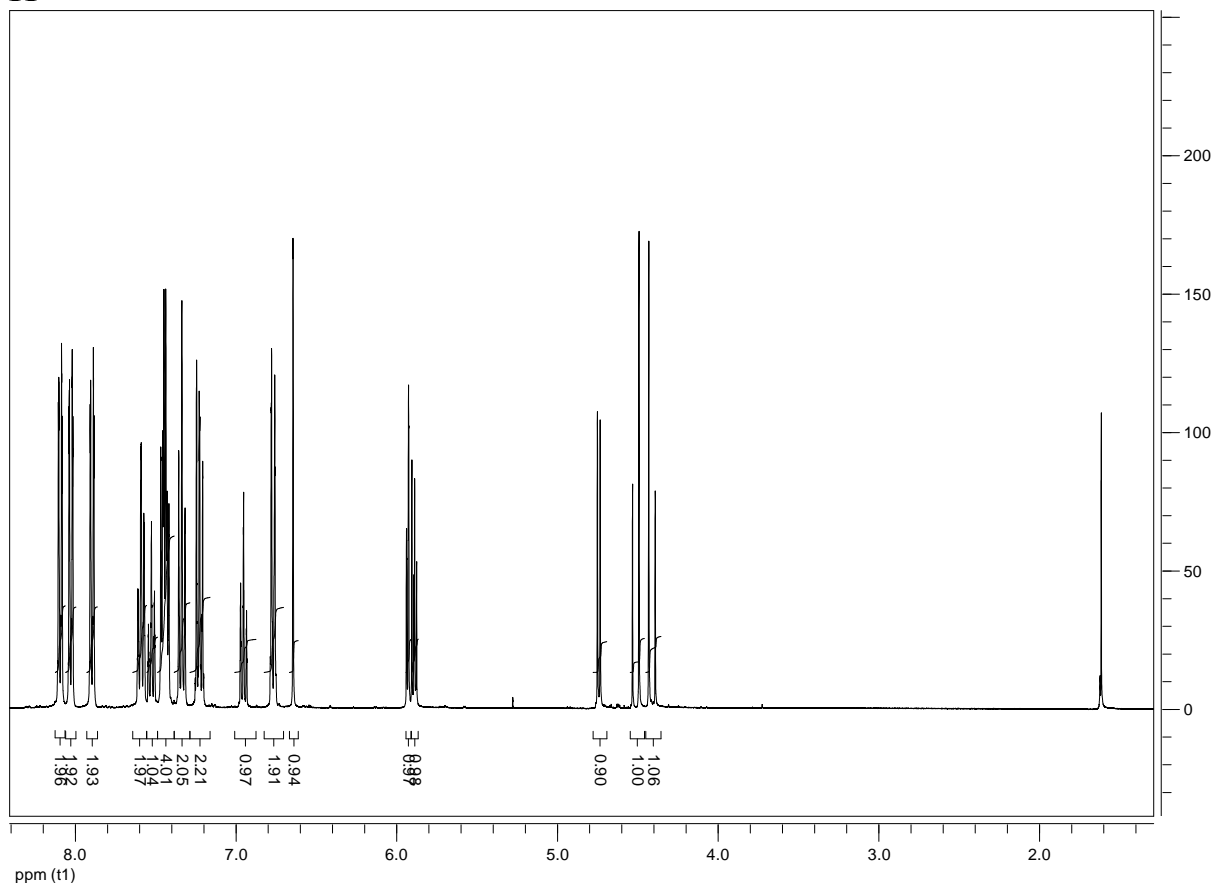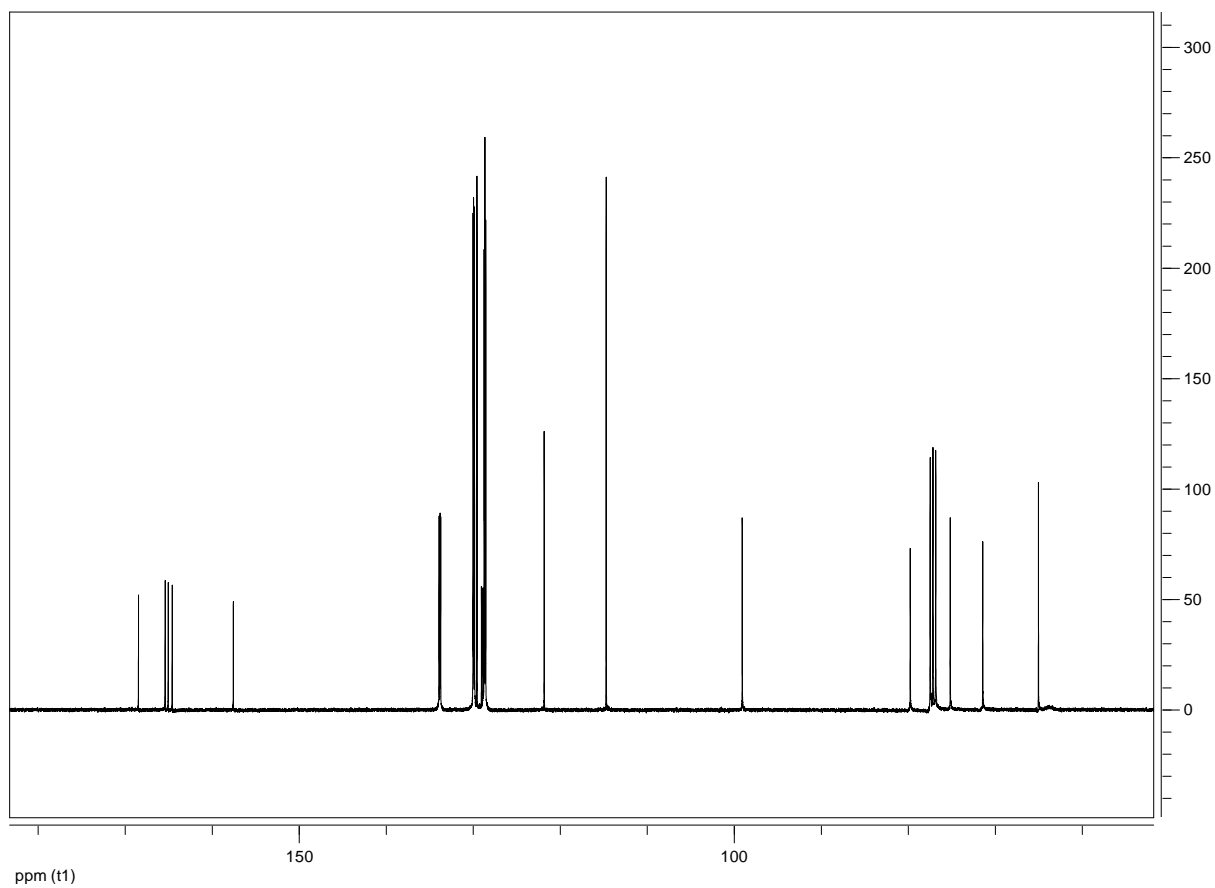

13

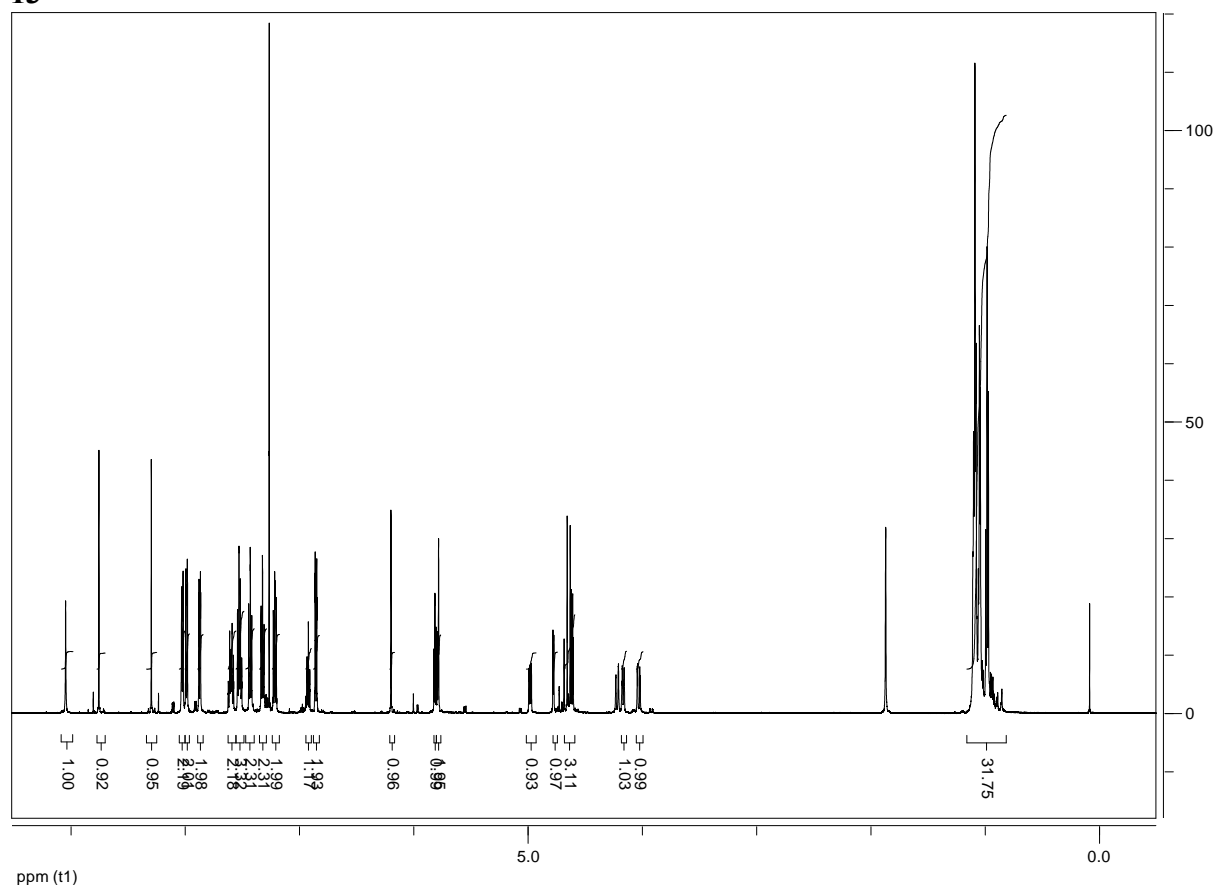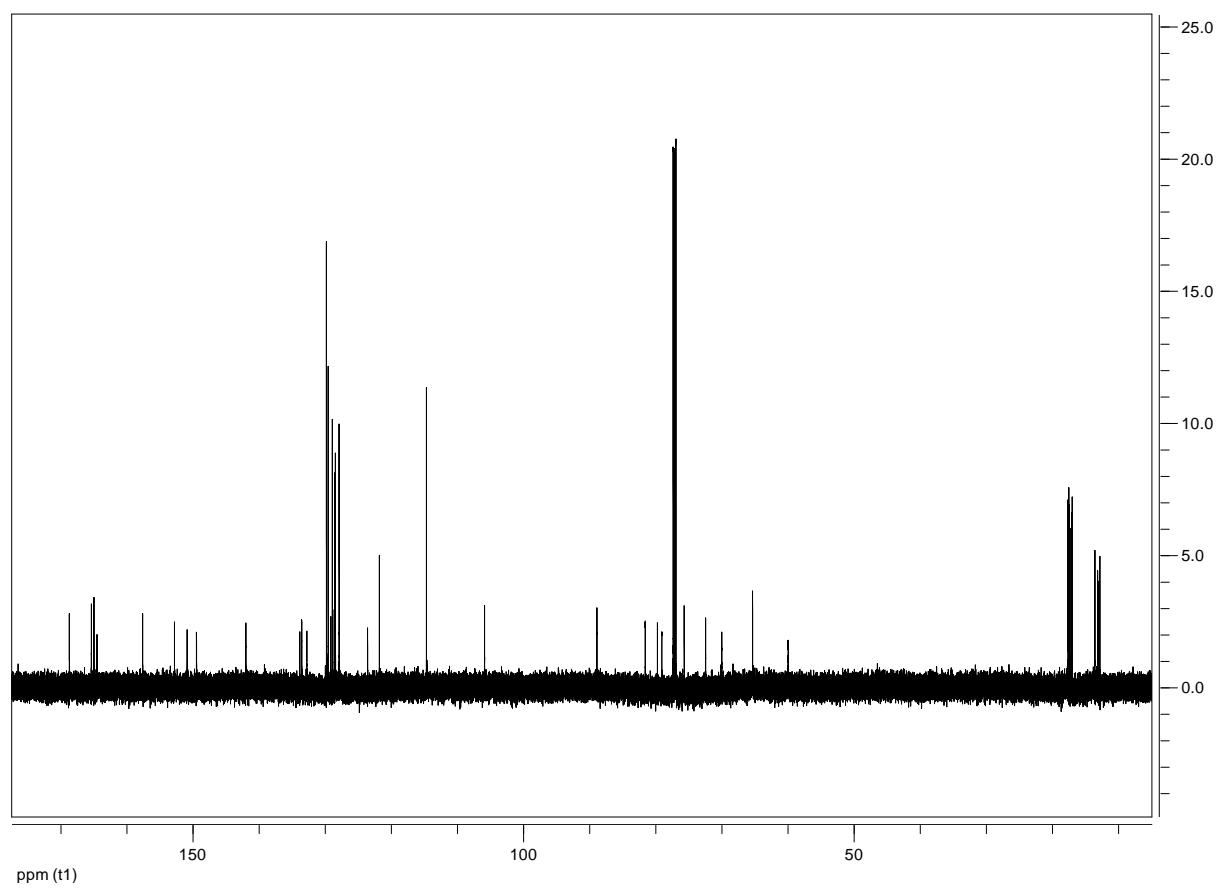

14

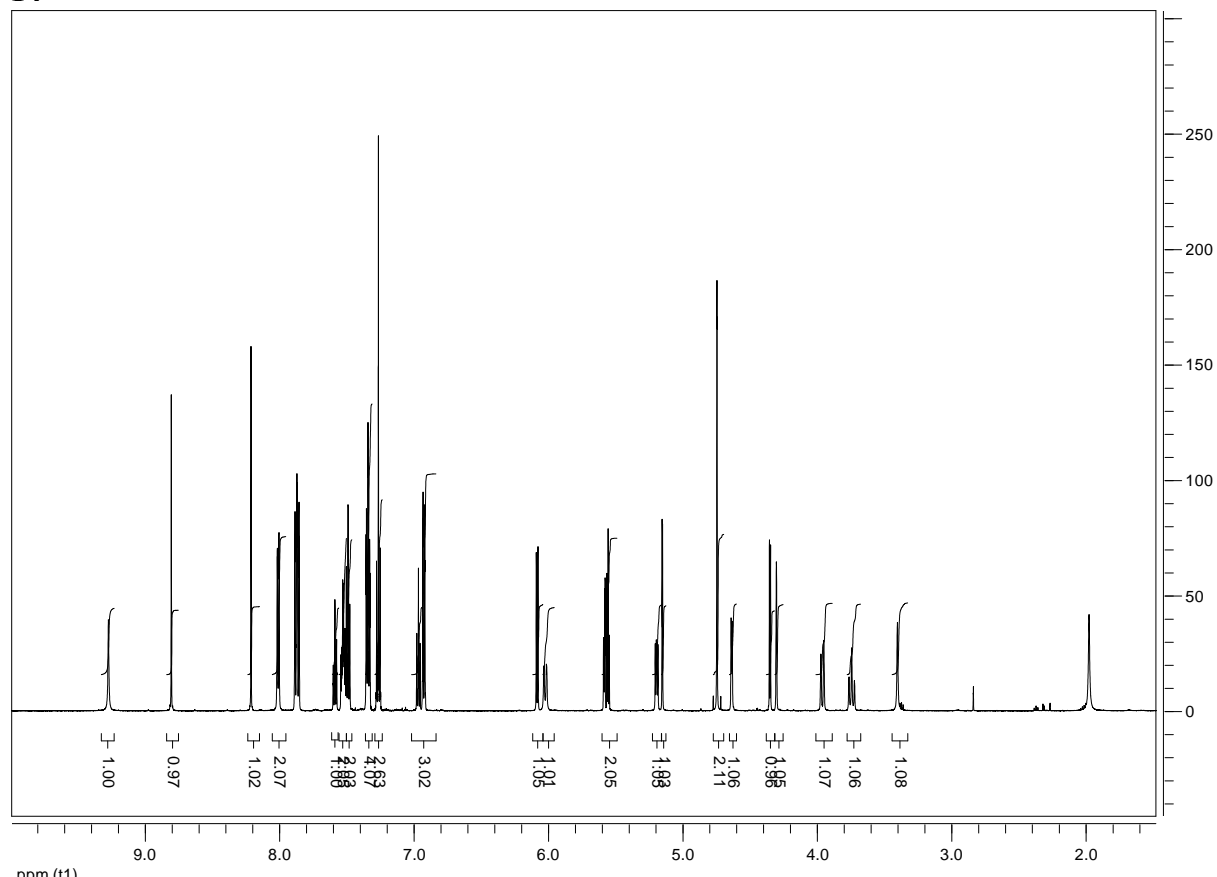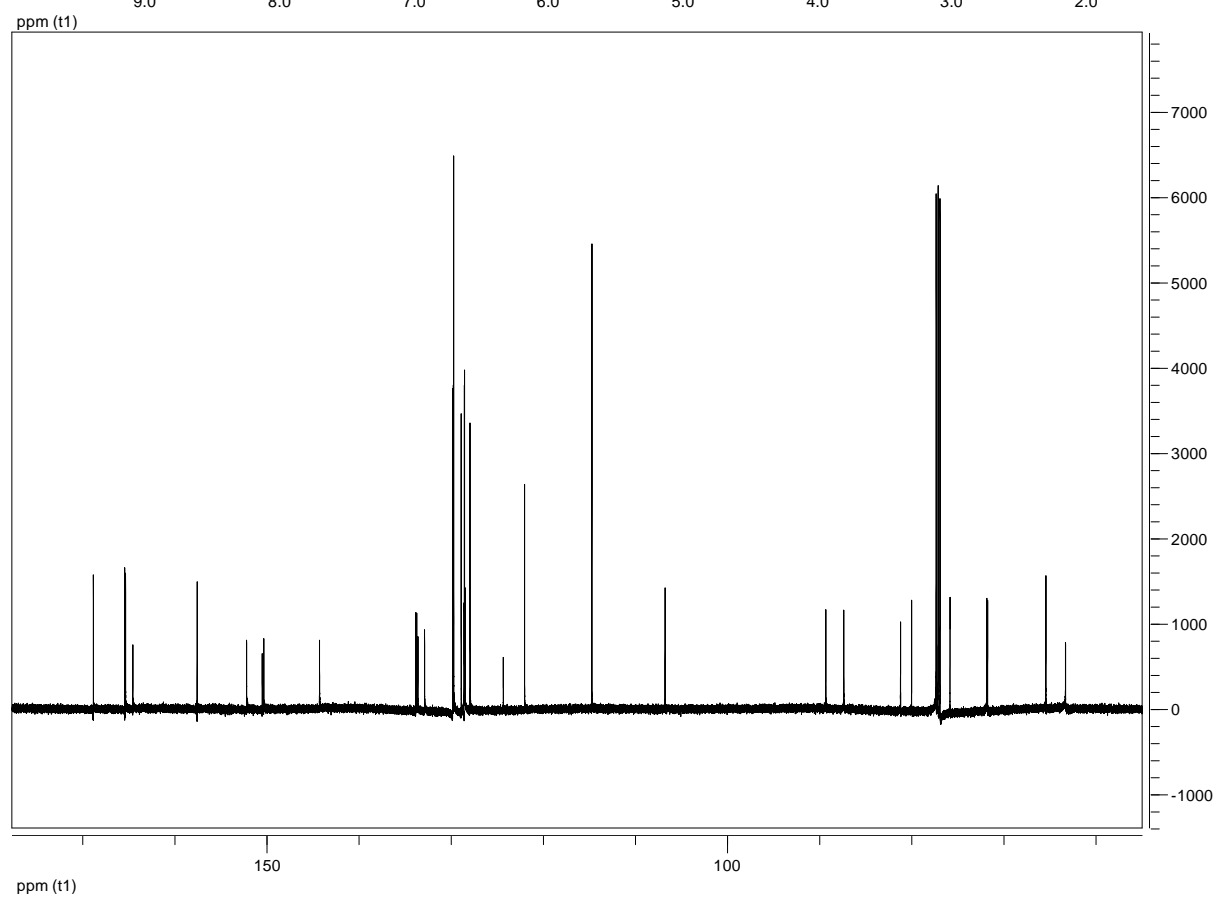

15

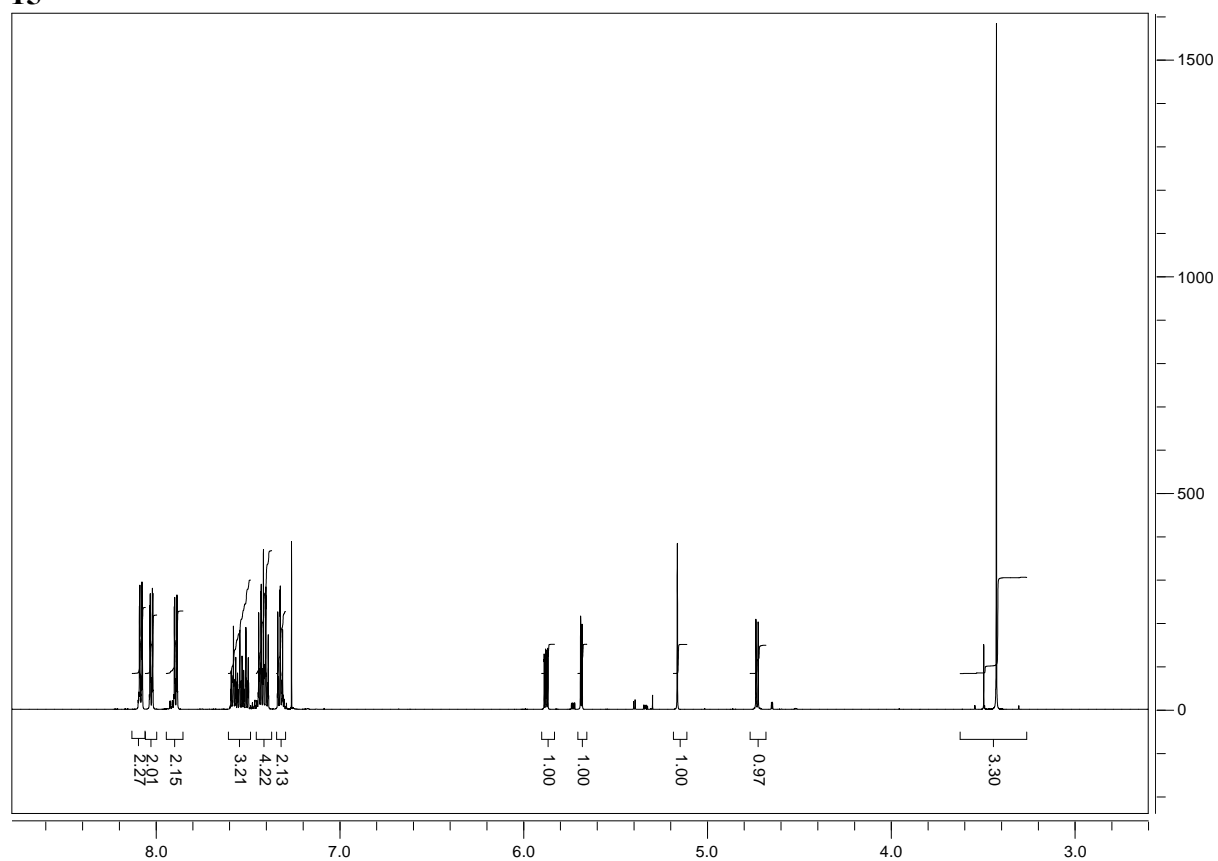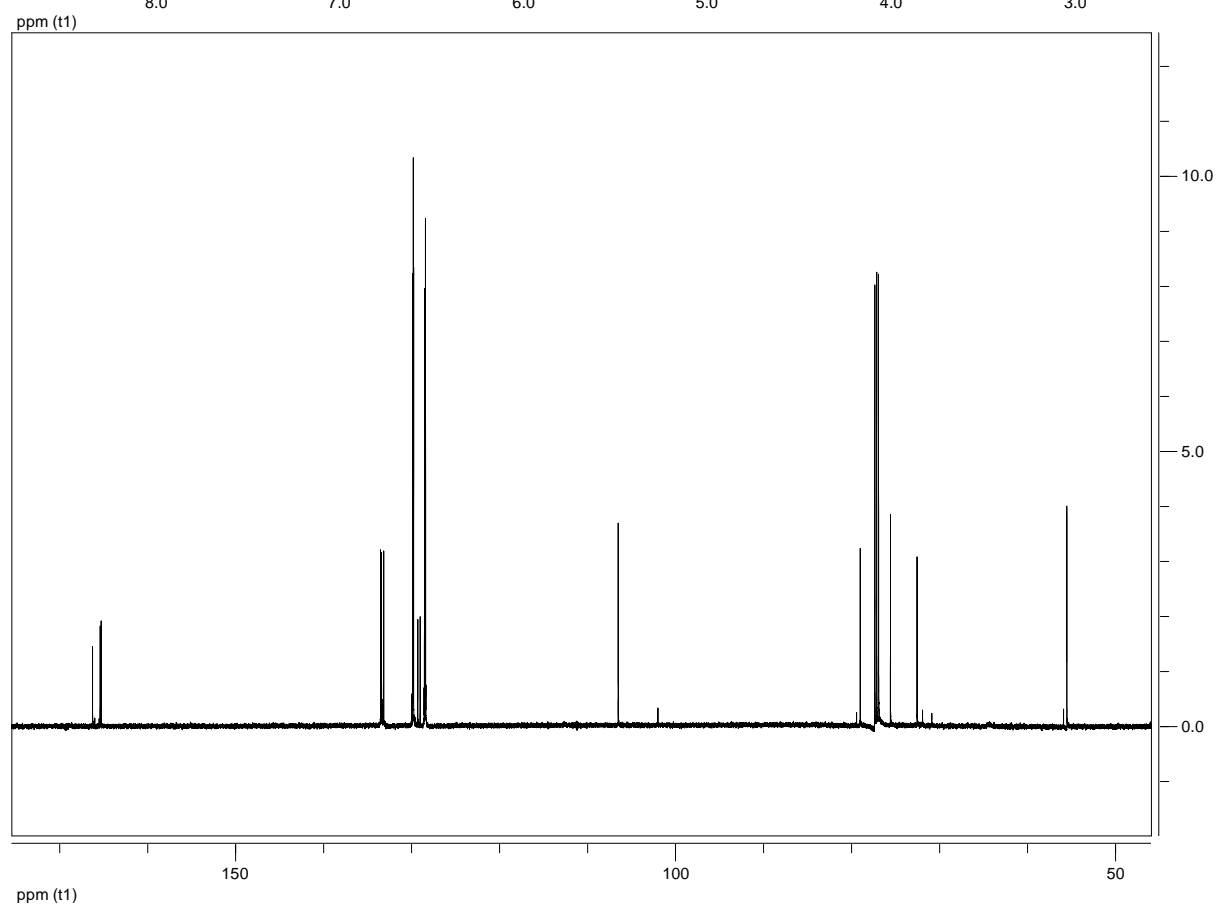

16

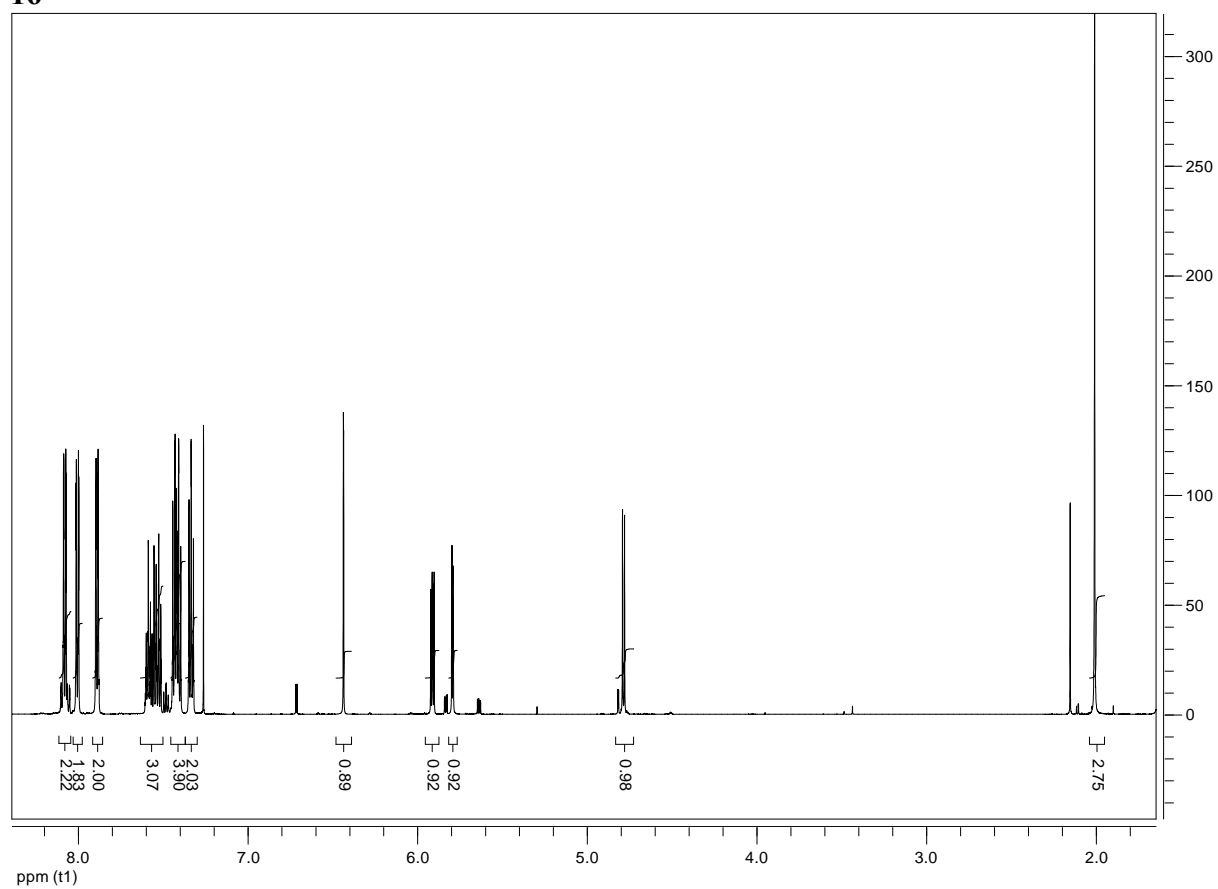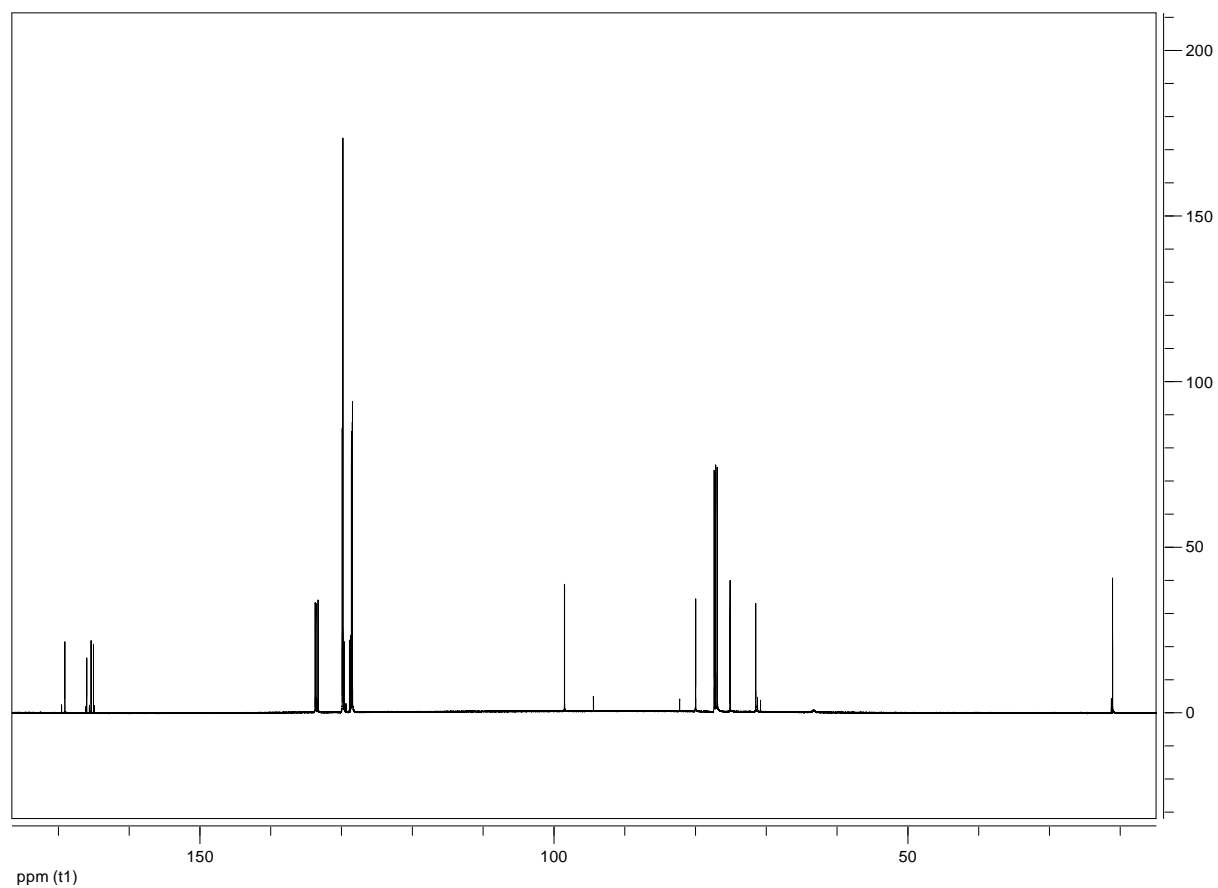

18

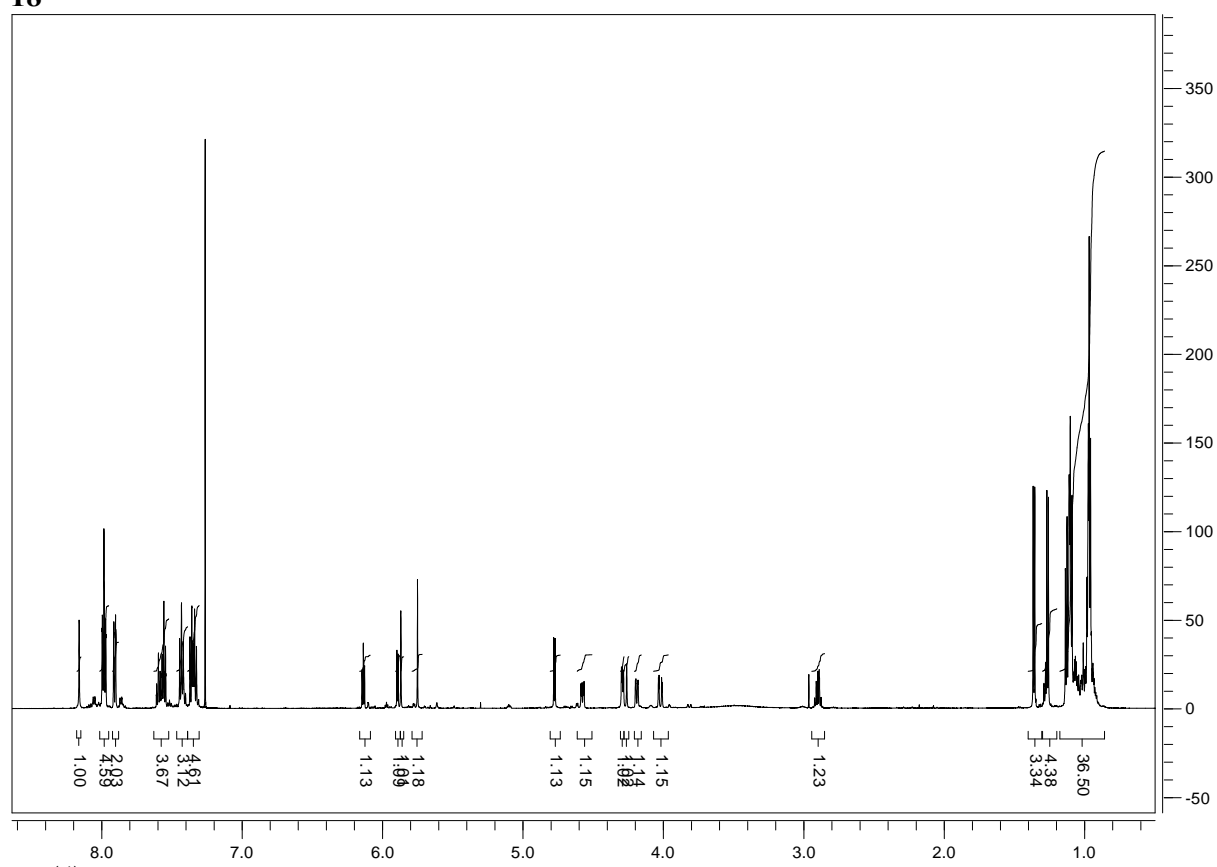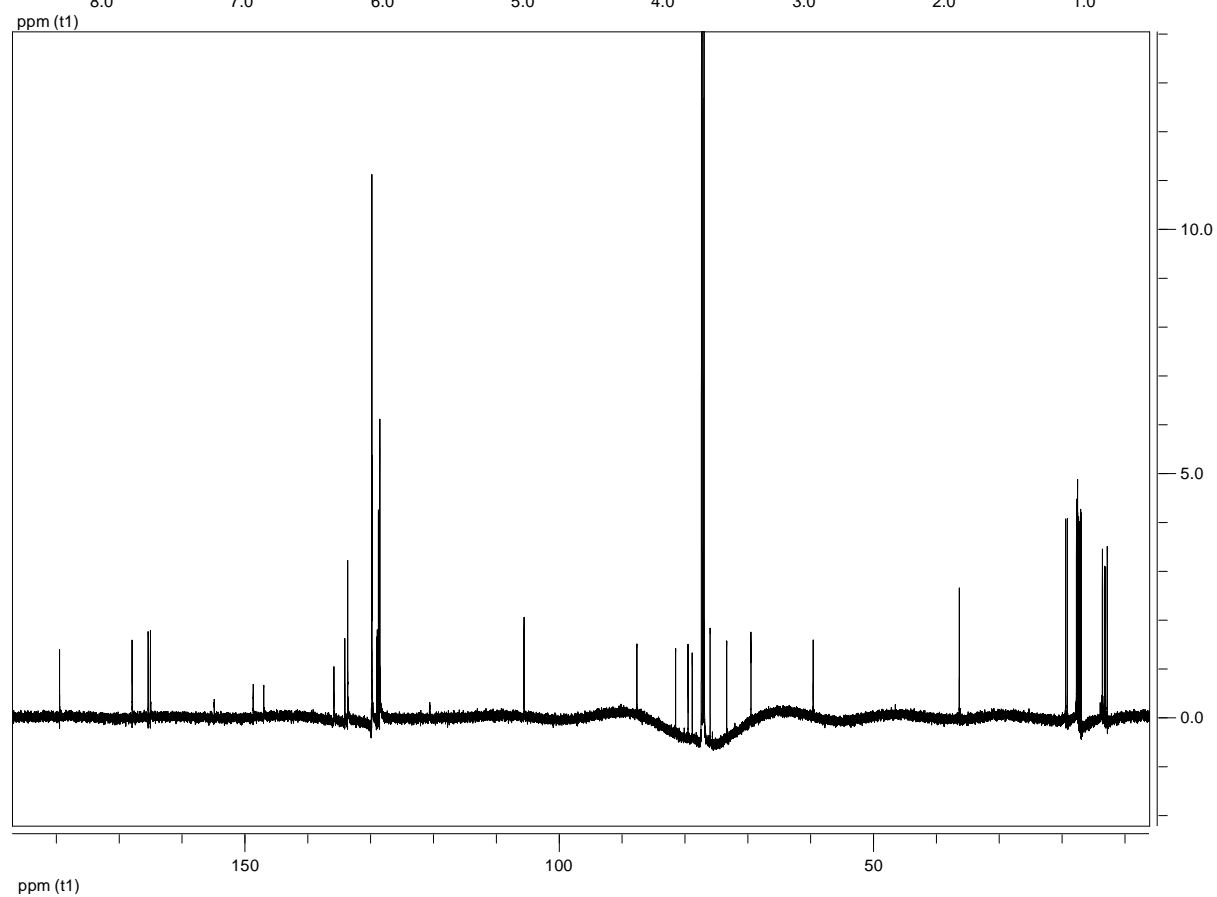

## Reference

1. T. Brückl, D. Globisch, M. Wagner, M. Müller and T. Carell, *Angew. Chem. Int. Ed.*, 2009, **48**, 7932–7934.
